# Supplementary material
Source: publisher site journal article supplement (https://www.dovepress.com/article/460468)
Supplement: Supplementary file 1 [file get_supplementary_file.php]

## **SUPPLEMENTARY INFORMATION**

- Supplementary Figure 1. A scheme for the synthesis of hyaluronic acid-bilirubin conjugate (HA-BR)
- Supplementary Figure 2. Characterization of HA-BR.
- Supplementary Figure 3. Preparation and characterization of DOX@HABN.
- Supplementary Figure 4. Responsiveness of HABN to peroxy radicals.
- Supplementary Figure 5. Identification of extracellular ROS.
- Supplementary Figure 6. In vitro cytotoxicity of DOX@HABN in HepG2 cells

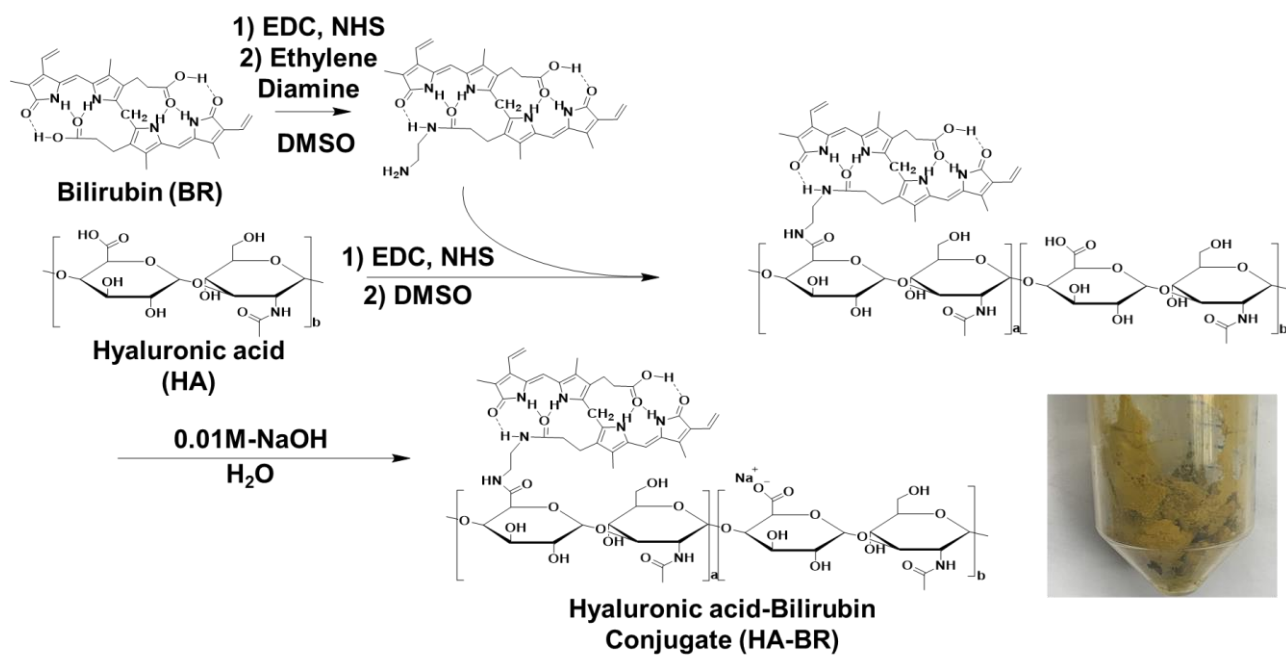

Supplementary Figure 1. A scheme for the synthesis of hyaluronic acid-bilirubin conjugate (HA-BR).

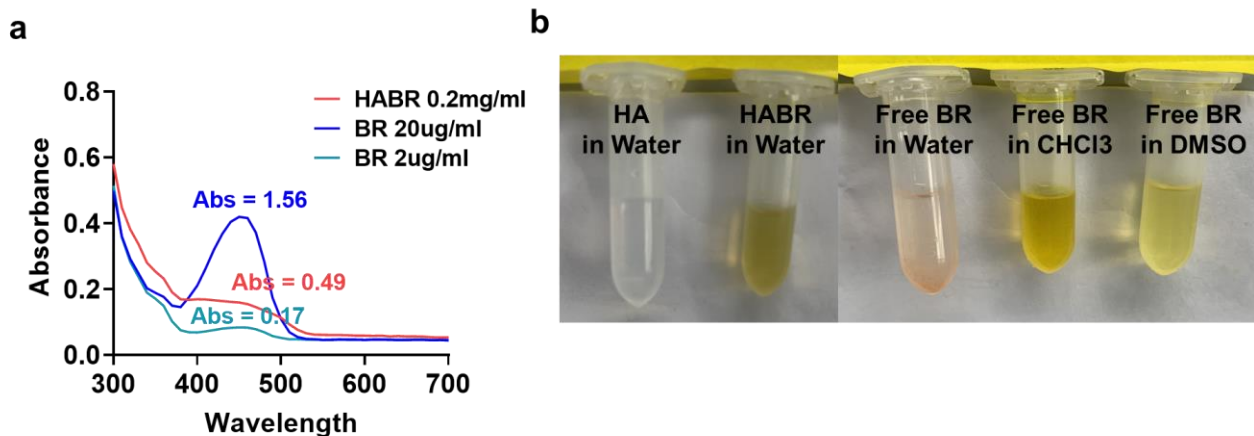

**Supplementary Figure 2. Characterization of HA-BR.** **a**, UV/Vis spectra of HA-BR (0.2 mg/ml) and Bilirubin (20  $\mu$ g/ml and 2  $\mu$ g/ml). **b**, Solubility or dispersibility of HA (3 mg/ml), Bilirubin (100  $\mu$ g/ml), or HA-BR (3 mg/ml) in water,  $\text{CHCl}_3$ , or DMSO.

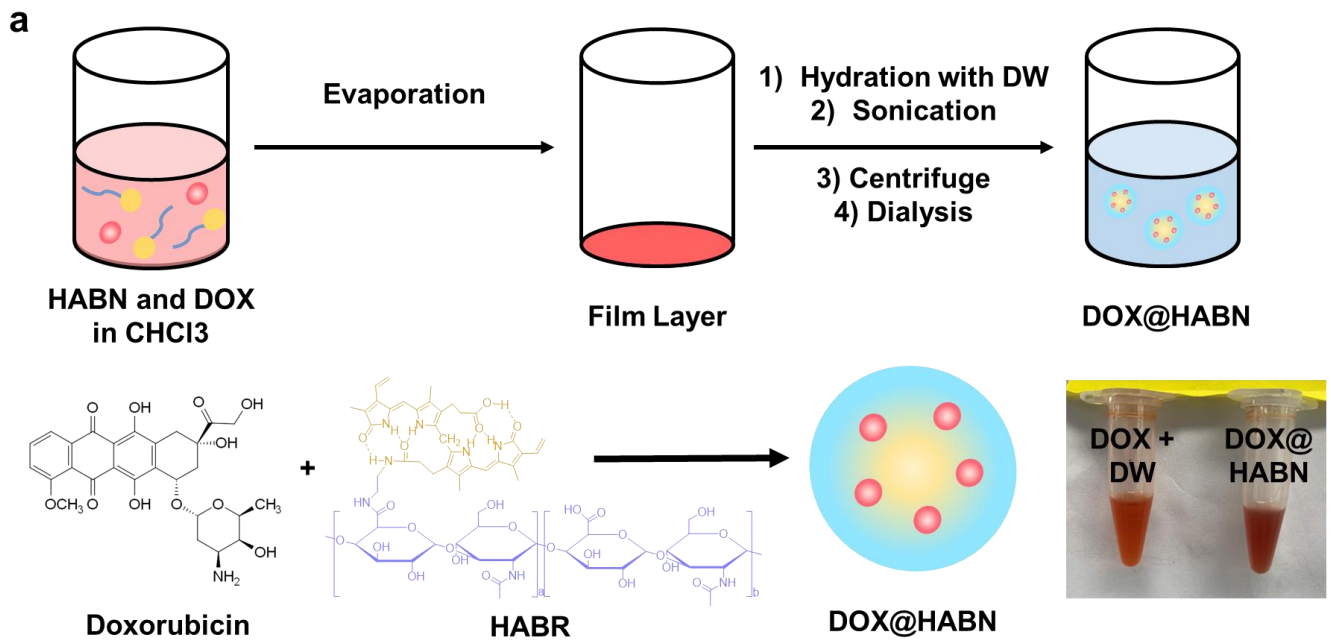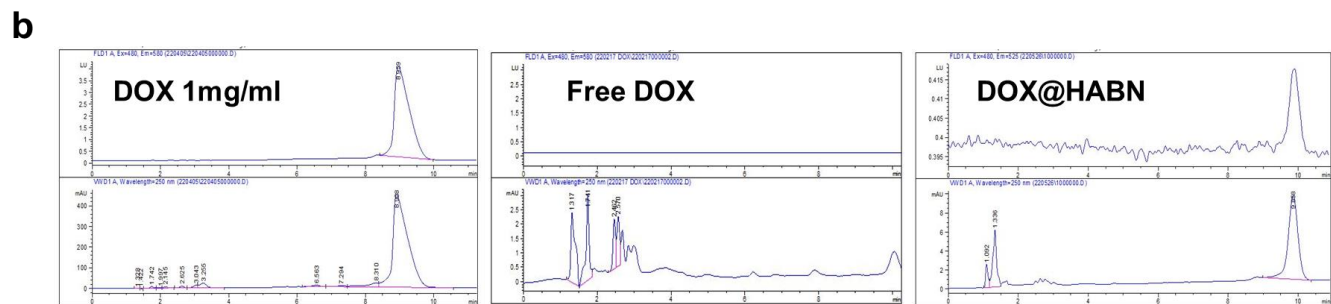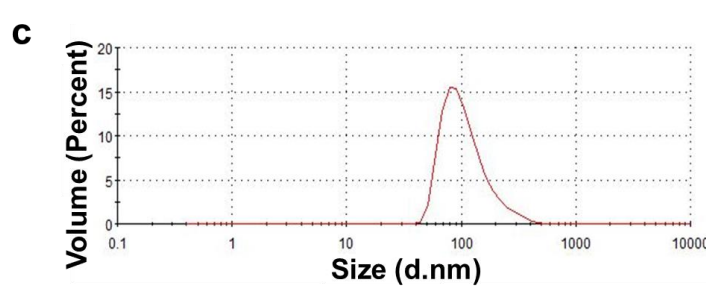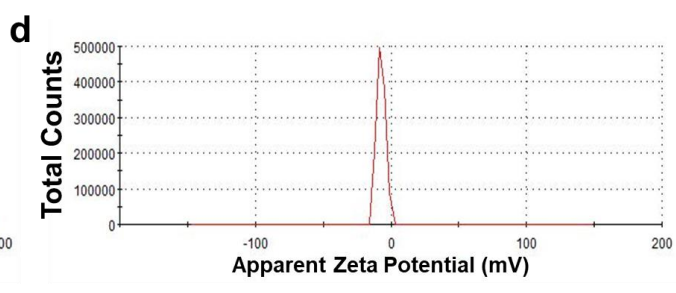

**Supplementary Figure 3. Preparation and characterization of DOX@HABN** **a**, Scheme for the formulation of hyaluronic acid-bilirubin nanoparticles (HABN) loaded with DOX **b**, HPLC chromatograms of DOX·HCl (1 mg/ml) in water, DOX in water, and DOX in DOX@HABN (in water). **c-d**, Hydrodynamic sizes (**c**) and zeta potential (**d**) of DOX@HABN.

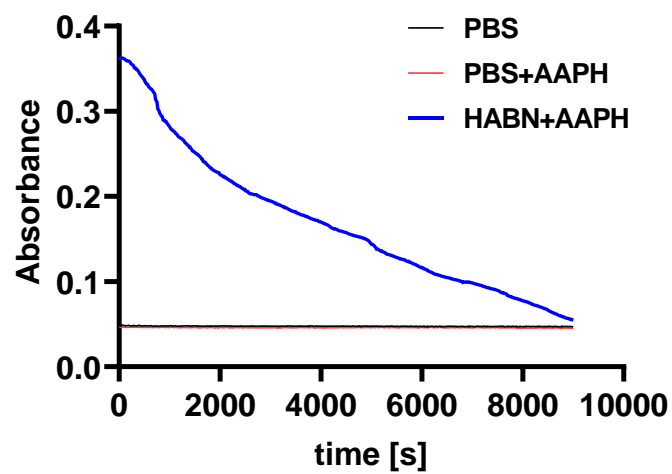

**Supplementary Figure 4. Responxiveness of HABN to peroxy radicals.** Change in UV/Vis absorbance at 450 nm of HABN treated with the peroxy radical generator AAPH for 1 h.

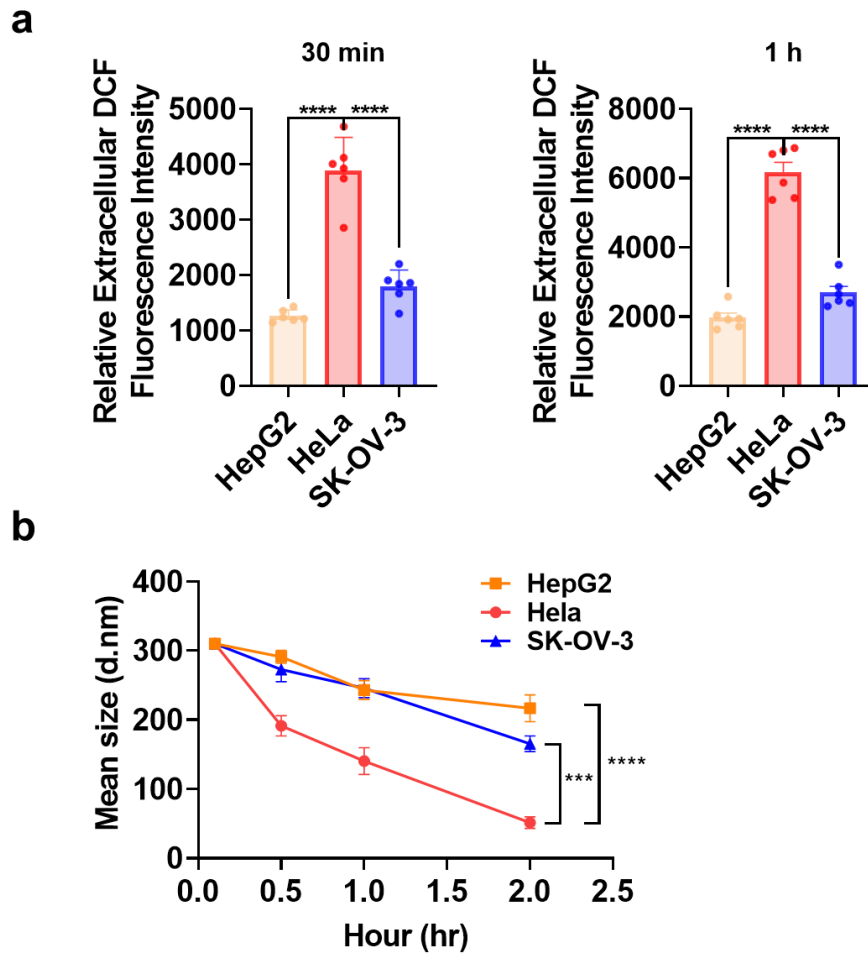

**Supplementary Figure 5. Identification of extracellular ROS.** **a**, Comparison of the correlation of extracellular ROS levels (determined DCFDA dye) with fluorescence intensity in cell culture medium of HeLa, HepG2 and SK-OV-3 cells. **b**, Size changes of HABN (1 mg/ml) in cell culture medium of HeLa, HepG2 and SK-OV-3 cells. Data are presented as mean  $\pm$  s.e.m. from a representative experiment. \*\*\* $P < 0.001$ , \*\*\*\* $P < 0.0001$ , analyzed by one-way ANOVA with Tukey's HSD multiple comparison post hoc test.

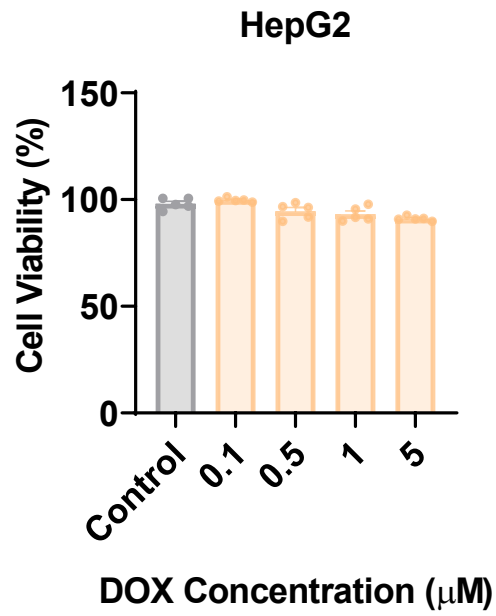

**Supplementary Figure 6. In vitro cytotoxicity of DOX@HABN in HepG2 cells.** Cell viability of HepG2 cells treated with different concentrations of DOX@HABN (10% DOX loading percentage) for 30 min, followed by further incubation for 48 h. Data are presented as mean  $\pm$  s.e.m. from a representative experiment.
